# Supplementary material for: Flavonoids’ Effects on Caenorhabditis elegans’ Longevity, Fat Accumulation, Stress Resistance and Gene Modulation Involve mTOR, SKN-1 and DAF-16
Source: PubMed Central journal article supplement (PMC8001597; doi:10.3390/antiox10030438), 2021-03-12
Supplement: antioxidants-10-00438-s001.pdf [file antioxidants-10-00438-s001.pdf]

Supplementary material

**Flavonoids' Effects on *Caenorhabditis elegans*' Longevity, Fat Accumulation,  
Stress Resistance and Gene Modulation Involve mTOR, SKN-1 and DAF-16**

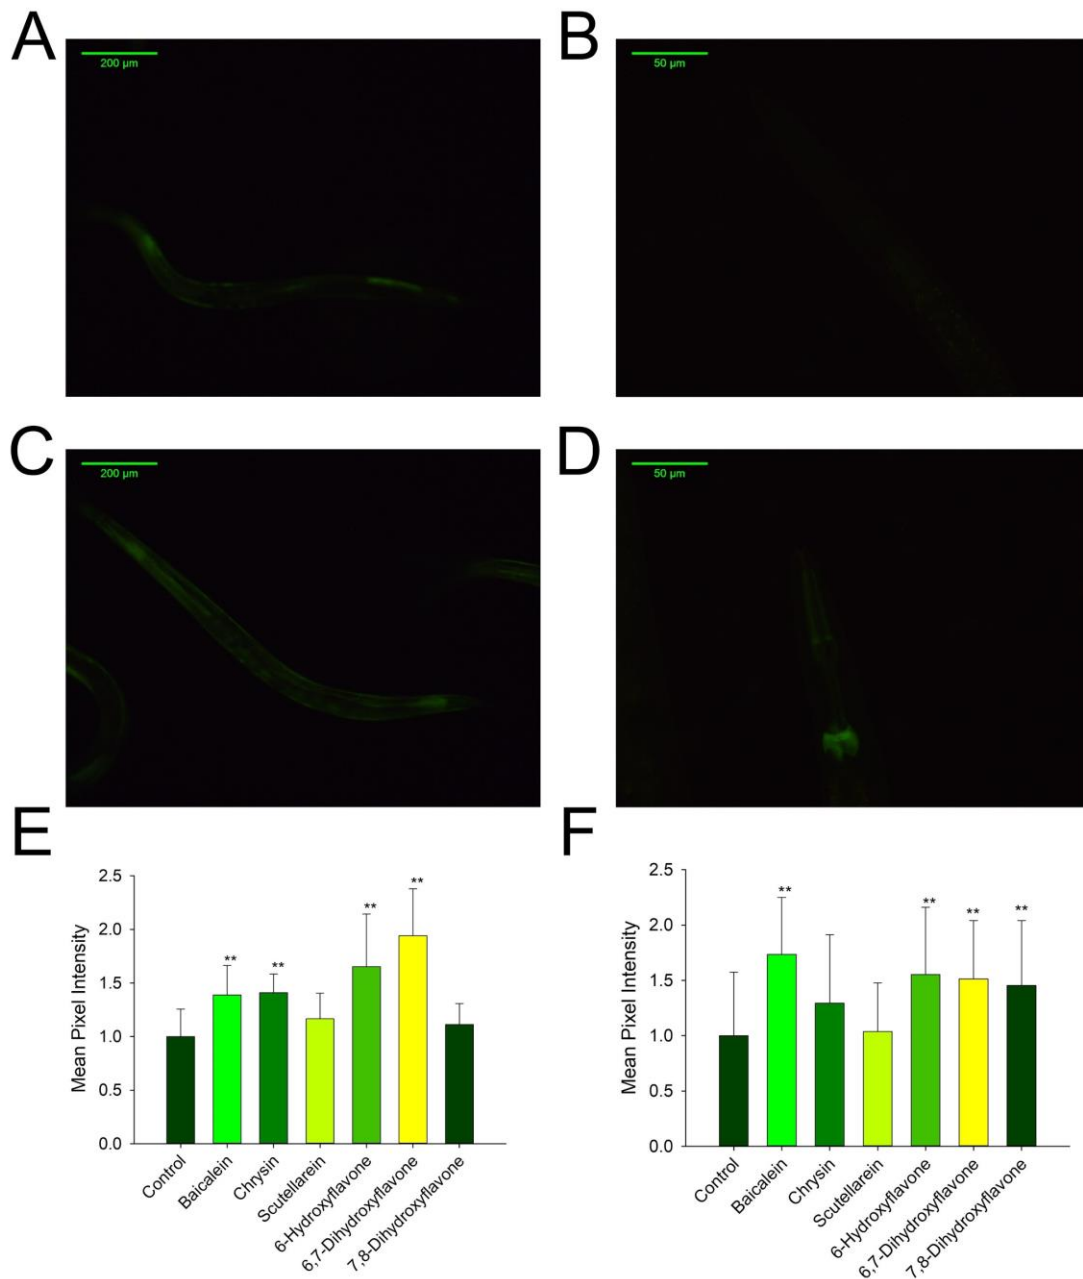

**Figure S1.** Flavones effect on GST-4 and GSC-1 expression. (a-d) Representative image of: (a) Control *C. elegans* of the CL2166 (GST-4 reporter) strain. (b) Control animal of the LD1171 (GSC-1 reporter) strain. (c) CL2166 worm treated with 6,7-dihydroxyflavone (100  $\mu$ M). (d) *C. elegans* LD1171 treated with baicalein (100  $\mu$ M). Scale bar for (a) and (c) 200  $\mu$ m, magnification 10x, and scale bar for (b) and (d) 50  $\mu$ m, magnification 40x. (e) Quantification of the flavones effect on the expression of GST-4. (f) Quantification of the flavones effect on the expression of GSC-1. Data is represented as mean $\pm$ S.D, n > 10, two independent experiments were performed, \*\*significantly at  $p \leq 0.05$  by ANOVA test.

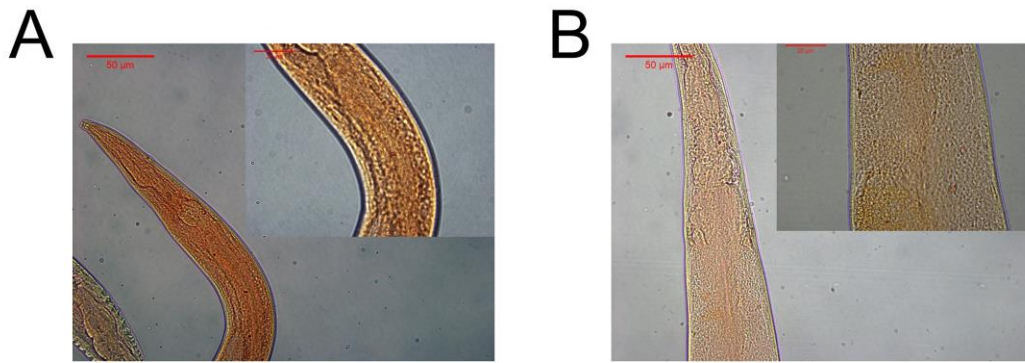

**Figure S2.** Effect of flavonoids stained with Red O (ORO). **(a)** DMSO control worm magnification 40x, inset magnification 100x. **(b)** Worm treated with 100  $\mu$ M of chrysin magnification 40x, inset magnification 100x. Scale bar: 50  $\mu$ m, scale bar of the insets 20  $\mu$ m.

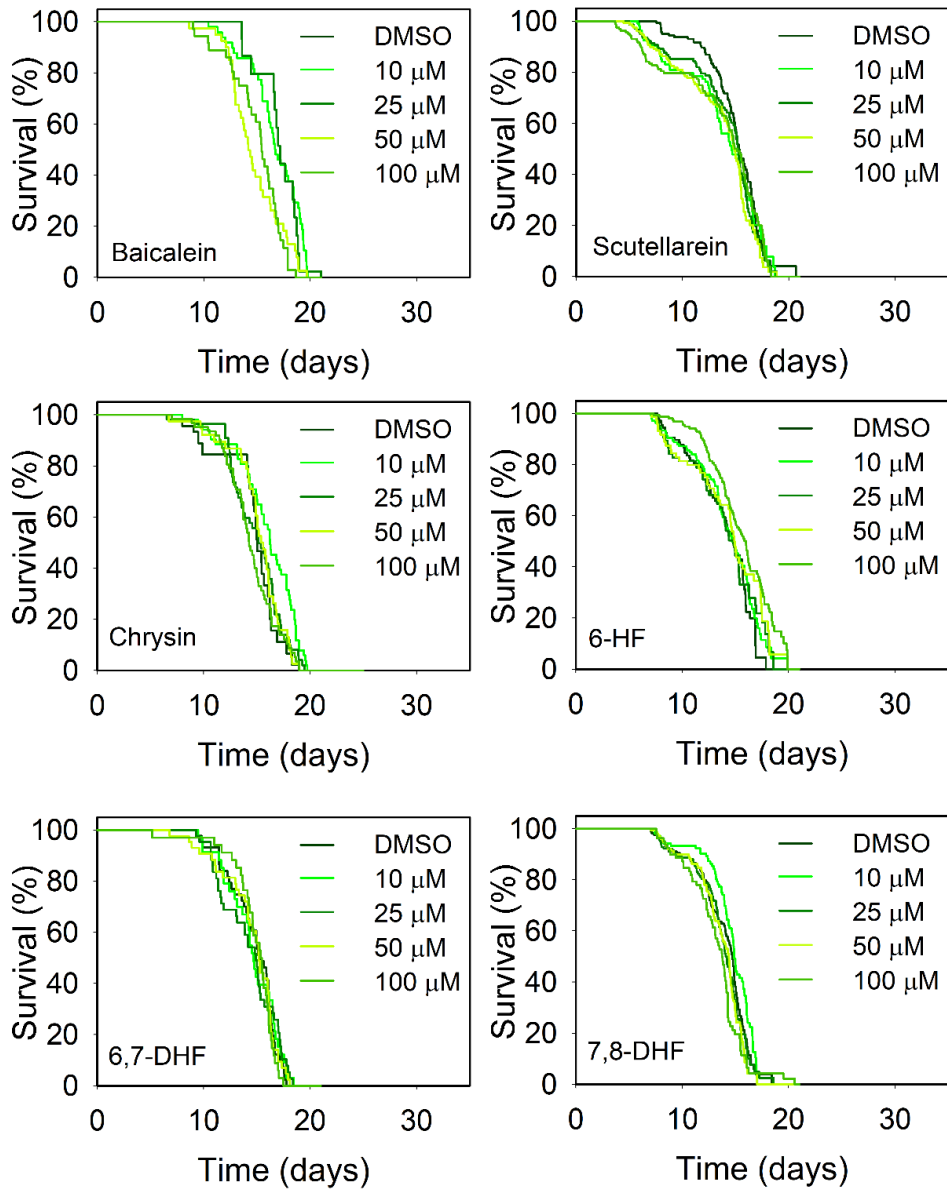

**Figure S3.** Lifespan curves adjusted to Kaplan-Meier estimator for the *C. elegans* strain N2 treated with individual flavonoids.

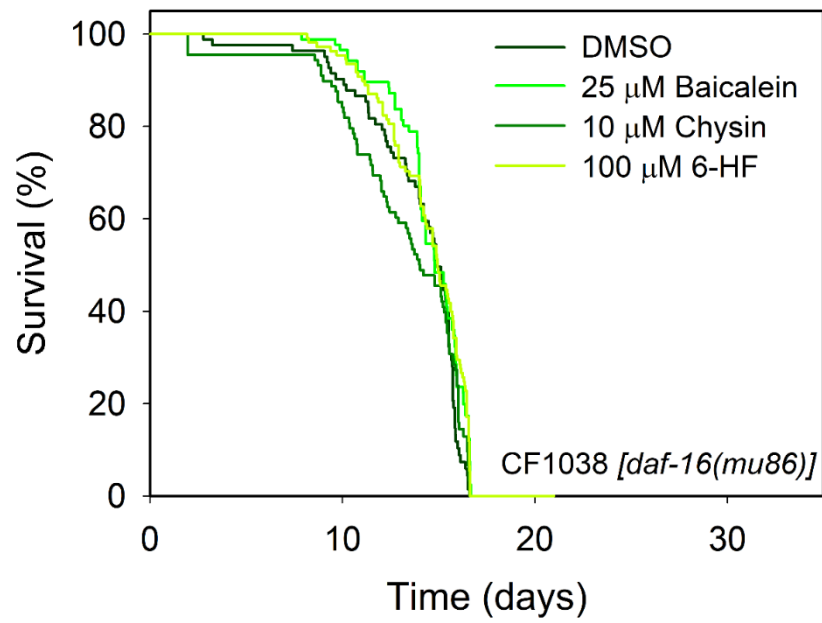

**Figure S4.** Lifespan curves adjusted to Kaplan-Meier estimator for the *C. elegans* strain CF1038 treated with individual flavonoids baicalein, chrysin and 6-hydroxyflavone.

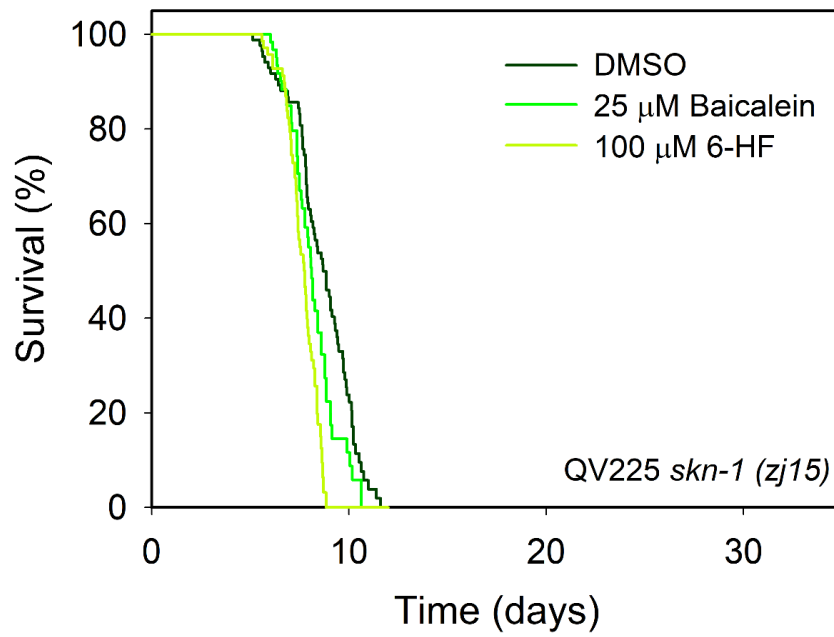

**Figure S5.** Lifespan curves adjusted to Kaplan-Meier estimator for the *C. elegans* strain QV225 treated with baicalein and 6-hydroxyflavone.

**Supplemental Table 1. Survival data for the *C. elegans* treated with flavonoids**

| <i>C. elegans</i><br>Strain | Flavonoid                | Concentration<br>( $\mu$ M) | n     | Mean<br>Lifespan<br>(days) | S. E<br>( $\pm$ day) | Lifespan<br>Change<br>(%) | <i>p</i> -value vs<br>Control |
|-----------------------------|--------------------------|-----------------------------|-------|----------------------------|----------------------|---------------------------|-------------------------------|
| N2<br>Wild-type             | Baicalein                | 0                           | 166   | 14.33                      | 0.24                 |                           |                               |
|                             |                          | 10                          | 98    | 16.7                       | 0.25                 | 16.54                     | 0**                           |
|                             |                          | 25                          | 95    | 16.98                      | 0.27                 | 18.49                     | 0**                           |
|                             |                          | 50                          | 80    | 14.72                      | 0.28                 | 2.72                      | 0.0576                        |
|                             |                          | 100                         | 72    | 14.96                      | 0.29                 | 4.40                      | 0.0077**                      |
|                             | Chrysin                  | 0                           | 90    | 14.66                      | 0.28                 |                           |                               |
|                             |                          | 10                          | 104   | 15.9                       | 0.28                 | 8.46                      | 0.000006**                    |
|                             |                          | 25                          | 110   | 14.92                      | 0.25                 | 1.77                      | 0.1914                        |
|                             |                          | 50                          | 76    | 15.1                       | 0.29                 | 3.00                      | 0.226                         |
|                             |                          | 100                         | 124   | 14.38                      | 0.23                 | -1.91                     | 0.4426                        |
|                             | Scutellarein             | 0                           | 163   | 14.58                      | 0.29                 |                           |                               |
|                             |                          | 10                          | 109   | 13.79                      | 0.4                  | -5.42                     | 0.3076                        |
|                             |                          | 25                          | 105   | 14.08                      | 0.31                 | -3.43                     | 0.3288                        |
|                             |                          | 50                          | 136   | 13.54                      | 0.32                 | -7.13                     | 0.0457**                      |
|                             |                          | 100                         | 123   | 13.59                      | 0.36                 | -6.79                     | 0.3814                        |
|                             | 7,8-<br>Dihydroxyflavone | 0                           | 175   | 13.89                      | 0.21                 |                           |                               |
|                             |                          | 10                          | 105   | 14.58                      | 0.23                 | 4.97                      | 0.0263**                      |
|                             |                          | 25                          | 160   | 13.71                      | 0.22                 | -1.30                     | 0.4389                        |
|                             |                          | 50                          | 156   | 13.59                      | 0.2                  | -2.16                     | 0.1045                        |
|                             |                          | 100                         | 83    | 13.24                      | 0.31                 | -4.68                     | 0.0177                        |
| 6,7-<br>Dihydroxyflavone    | 0                        | 88                          | 14.71 | 0.24                       |                      |                           |                               |
|                             | 10                       | 70                          | 14.55 | 0.3                        | -1.09                | 0.4585                    |                               |
|                             | 25                       | 86                          | 14.29 | 0.29                       | -2.86                | 0.5925                    |                               |
|                             | 50                       | 86                          | 14.52 | 0.28                       | -1.29                | 0.8729                    |                               |
|                             | 100                      | 88                          | 14.77 | 0.27                       | 0.41                 | 0.2216                    |                               |
| 6-Hydroxyflavone            | 0                        | 111                         | 13.96 | 0.29                       |                      |                           |                               |
|                             | 10                       | 140                         | 14.29 | 0.3                        | 2.36                 | 0.3262                    |                               |
|                             | 25                       | 88                          | 14.04 | 0.4                        | 0.57                 | 0.5242                    |                               |

|                                |                  |     |     |       |      |        |          |
|--------------------------------|------------------|-----|-----|-------|------|--------|----------|
|                                |                  | 50  | 74  | 14.41 | 0.45 | 3.22   | 0.1312   |
|                                |                  | 100 | 159 | 15.61 | 0.25 | 11.82  | 0.0001** |
|                                |                  | 0   | 82  | 13.87 | 0.31 |        |          |
|                                | Baicalein        | 25  | 86  | 14.56 | 0.21 | 4.97   | 0.0168** |
| <i>(skn-1(zj15))</i>           | Chrysin          | 10  | 89  | 13.15 | 0.37 | -5.19  | 0.4943   |
|                                | 6-Hydroxyflavone | 100 | 108 | 14.38 | 0.21 | 3.68   | 0.0079** |
|                                |                  | 0   | 85  | 8.68  | 0.17 |        |          |
| CF1038 ( <i>daf-16(mu86)</i> ) | Baicalein        | 25  | 61  | 8.19  | 0.16 | -5.65  | 0.0172** |
|                                | 6-Hydroxyflavone | 100 | 70  | 7.65  | 0.1  | -11.87 | 7.8e-8** |



**Supplemental Table 2. Pathways modulated by baicalein treatment.** Data

obtained from the RNA microarray results vs DMSO control worms.

| Pathway Name                                           | DMSO       |                 |       | Baicalein  |                 |        |
|--------------------------------------------------------|------------|-----------------|-------|------------|-----------------|--------|
|                                                        | Enrichment | Enrichment      | %     | Enrichment | Enrichment      | %      |
|                                                        | Score      | <i>p</i> -value | genes | Score      | <i>p</i> -value | genes  |
| RNA transport                                          | 0.00       | 0.00            | 0.00  | 13.31      | 1.66E-06        | 60.00  |
| Aminoacyl-tRNA biosynthesis                            | 32.42      | 8.30E-15        | 52.94 | 12.05      | 5.84E-06        | 70.59  |
| DNA replication                                        | 0.00       | 0.00            | 0.00  | 11.64      | 8.78E-06        | 78.26  |
| Ribosome biogenesis in eukaryotes                      | 0.00       | 0.00            | 0.00  | 11.49      | 1.03E-05        | 76.00  |
| Base excision repair                                   | 0.00       | 0.00            | 0.00  | 9.16       | 1.05E-04        | 90.91  |
| Oxidative phosphorylation                              | 0.00       | 0.00            | 0.00  | 8.31       | 2.45E-04        | 56.60  |
| 2-Oxocarboxylic acid metabolism                        | 0.00       | 0.00            | 0.00  | 8.12       | 2.96E-04        | 90.00  |
| Fanconi anemia pathway                                 | 0.00       | 0.00            | 0.00  | 8.10       | 3.03E-04        | 71.43  |
| Glycosylphosphatidylinositol (GPI)-anchor biosynthesis | 0.00       | 0.00            | 0.00  | 7.84       | 3.93E-04        | 140.00 |
| Phenylalanine metabolism                               | 0.00       | 0.00            | 0.00  | 7.83       | 3.97E-04        | 100.00 |
| Homologous recombination                               | 0.00       | 0.00            | 0.00  | 6.52       | 1.48E-03        | 73.33  |
| Nucleotide excision repair                             | 0.00       | 0.00            | 0.00  | 6.09       | 2.28E-03        | 61.54  |
| Biosynthesis of amino acids                            | 0.00       | 0.00            | 0.00  | 5.92       | 2.69E-03        | 53.19  |
| Mismatch repair                                        | 0.00       | 0.00            | 0.00  | 5.69       | 3.39E-03        | 71.43  |
| Basal transcription factors                            | 0.00       | 0.00            | 0.00  | 5.09       | 6.13E-03        | 63.16  |
| Spliceosome                                            | 0.00       | 0.00            | 0.00  | 4.52       | 1.09E-02        | 45.95  |
| Cysteine and methionine metabolism                     | 0.00       | 0.00            | 0.00  | 4.45       | 1.16E-02        | 55.56  |
| Tyrosine metabolism                                    | 0.00       | 0.00            | 0.00  | 3.74       | 2.37E-02        | 58.82  |
| mRNA surveillance pathway                              | 0.00       | 0.00            | 0.00  | 3.56       | 2.86E-02        | 46.15  |
| Citrate cycle (TCA cycle)                              | 0.00       | 0.00            | 0.00  | 3.47       | 3.11E-02        | 50.00  |
| Longevity regulating pathway - multiple species        | 0.00       | 0.00            | 0.00  | 3.31       | 3.64E-02        | 48.57  |
| Arginine biosynthesis                                  | 0.00       | 0.00            | 0.00  | 3.25       | 3.87E-02        | 66.67  |
| Carbon metabolism                                      | 0.00       | 0.00            | 0.00  | 3.01       | 4.91E-02        | 42.47  |
| Lysosome                                               | 10.01      | 4.49E-05        | 18.67 | 0.00       | 0.00            | 0.00   |
| ABC transporters                                       | 4.48       | 0.01            | 20.00 | 0.00       | 0.00            | 0.00   |
